# Supplementary material
Source: publisher site journal article supplement (https://static.cambridge.org/content/id/urn:cambridge.org:id:article:S1751731119002799/resource/name/S1751731119002799supp001.pdf)
Supplement: Supplementary file 1 [file S1751731119002799supp001.pdf]

**Effect of altering ruminal pH by dietary buffer supplementation on methane emissions from sheep fed forage rape**

X. Z. Sun, R. Harland and D. Pacheco

Animal

**Supplementary Figure S1** Daily ruminal pH value of fistulated sheep fed forage rape, with or without Na<sub>2</sub>CO<sub>3</sub> supplemented, measured using pH bolus at an interval of 15 min during the CH<sub>4</sub> measurement period of P04. The arrows indicate the feeding time.

**Supplementary Table S1** Area (pH x hour) below a certain level of daily ruminal pH value of fistulated sheep (n=4 per treatment for each period) fed forage rape supplemented with sodium carbonate (Na<sub>2</sub>CO<sub>3</sub>: SC) or unsupplemented control diet (C), measured using pH monitoring boluses.

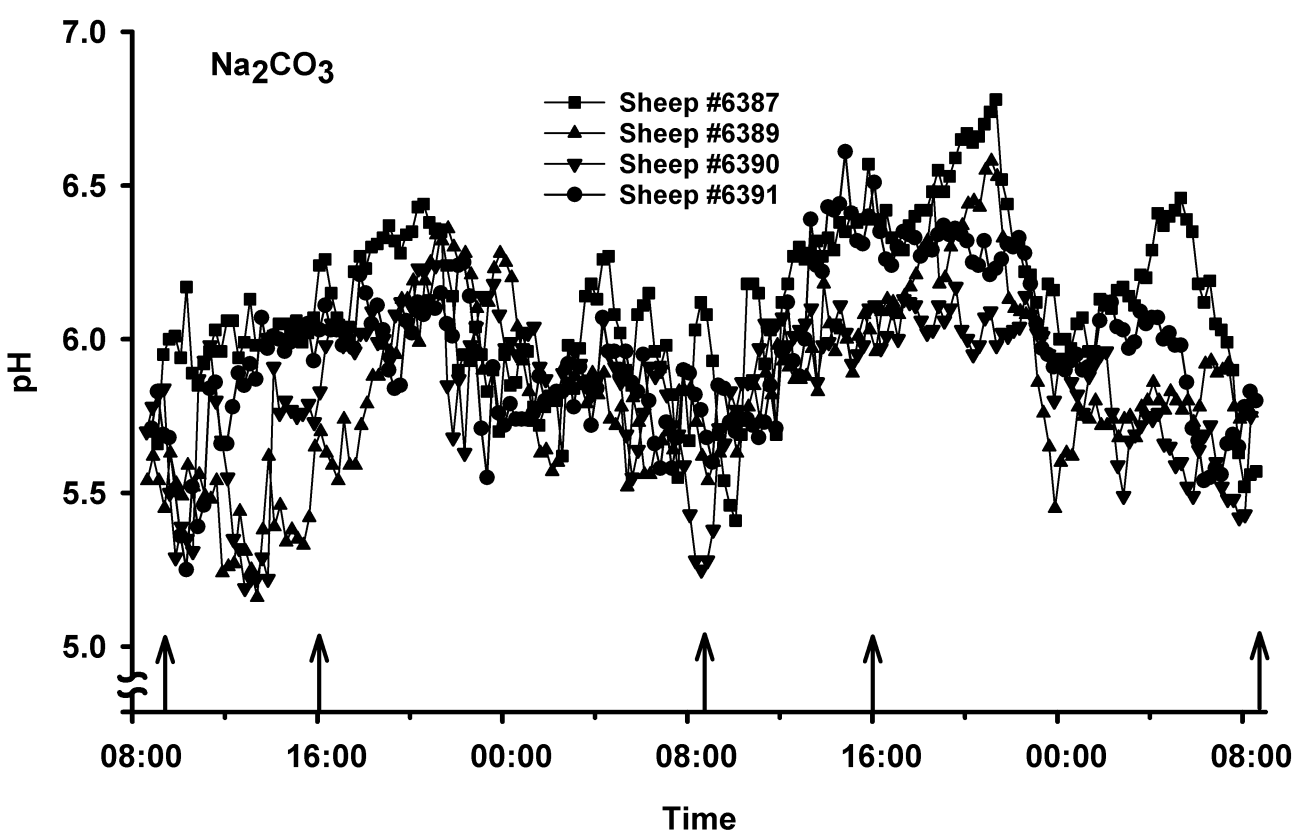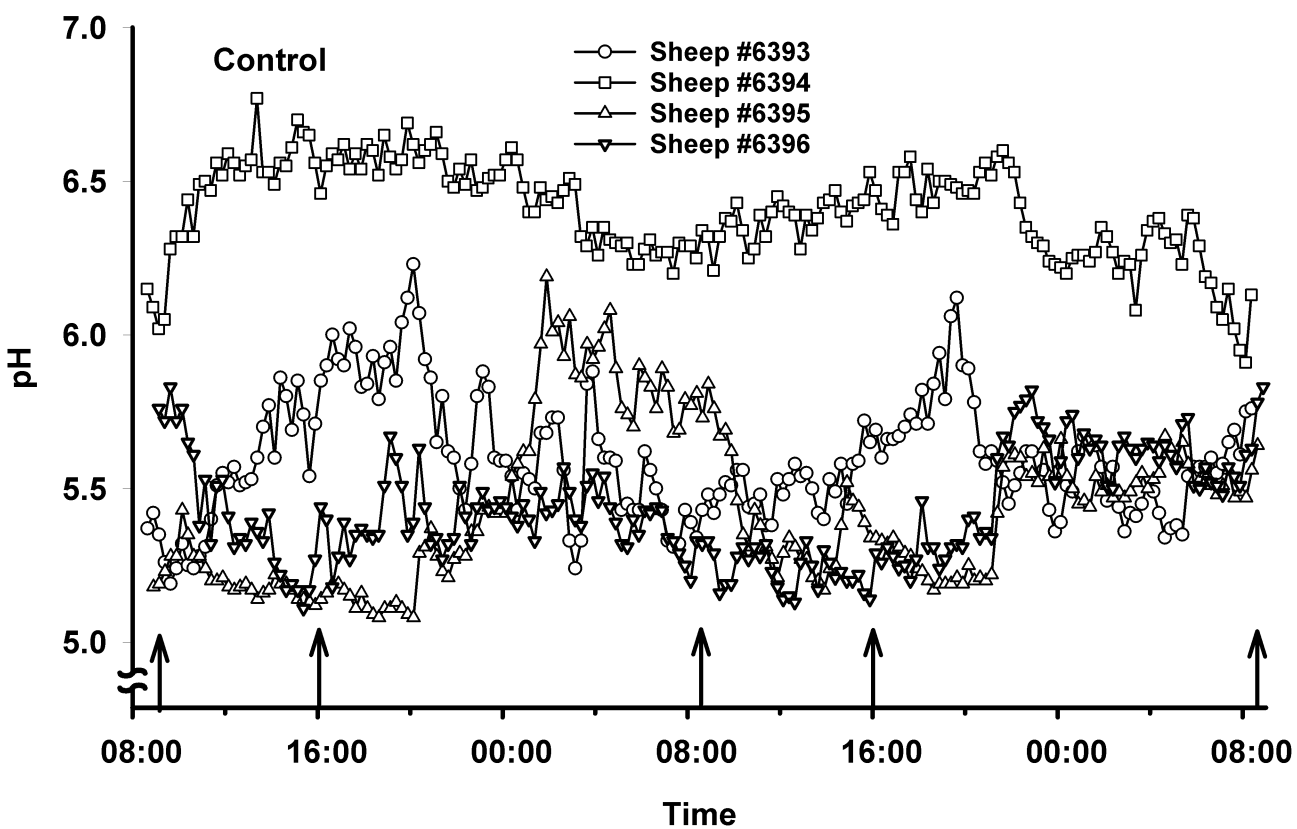

**Supplementary Figure S1** Daily ruminal pH value of fistulated sheep fed forage rape, with or without Na<sub>2</sub>CO<sub>3</sub> supplemented, measured using pH bolus at an interval of 15 min during the CH<sub>4</sub> measurement period of P04. The arrows indicate the feeding time.

**Supplementary Table S1** Area (pH x hour) below a certain level of daily ruminal pH value of fistulated sheep (n=4 per treatment for each period) fed forage rape supplemented with sodium carbonate (Na<sub>2</sub>CO<sub>3</sub>: SC) or unsupplemented control diet (C), measured using pH monitoring boluses.

|        | Treatment |       | SEM   | P value |
|--------|-----------|-------|-------|---------|
|        | C         | SC    |       |         |
| pH<5.5 |           |       |       |         |
| P01    | 0.59      | 0.52  | 0.197 | 0.80    |
| P02    | 0.39      | 0.44  | 0.225 | 0.88    |
| P03    | 0.42      | 0     | 0.155 | 0.11    |
| P04    | 1.78      | 0.21  | 0.580 | 0.11    |
| P05    | 0.63      | 0.06  | 0.385 | 0.34    |
| P06    | 0.61      | 0.16  | 0.248 | 0.25    |
| P07    | 0.30      | 0.21  | 0.122 | 0.63    |
| pH<5.8 |           |       |       |         |
| P01    | 4.27      | 3.47  | 0.943 | 0.57    |
| P02    | 3.17      | 2.53  | 1.112 | 0.70    |
| P03    | 2.92      | 0.10  | 0.730 | 0.03    |
| P04    | 5.89      | 1.36  | 1.545 | 0.08    |
| P05    | 2.81      | 0.7   | 1.063 | 0.21    |
| P06    | 3.84      | 1.51  | 1.226 | 0.23    |
| P07    | 2.95      | 3.15  | 0.953 | 0.89    |
| pH<6.0 |           |       |       |         |
| P01    | 8.40      | 6.85  | 1.416 | 0.47    |
| P02    | 6.54      | 5.24  | 1.828 | 0.63    |
| P03    | 6.43      | 0.69  | 1.132 | 0.01    |
| P04    | 9.30      | 3.42  | 2.363 | 0.13    |
| P05    | 6.00      | 2.29  | 1.845 | 0.20    |
| P06    | 7.29      | 3.45  | 2.183 | 0.26    |
| P07    | 6.10      | 6.86  | 1.720 | 0.77    |
| pH<6.2 |           |       |       |         |
| P01    | 13.09     | 10.93 | 1.716 | 0.41    |
| P02    | 10.59     | 8.98  | 2.368 | 0.65    |
| P03    | 10.86     | 2.53  | 1.267 | <0.01   |
| P04    | 12.91     | 6.87  | 3.188 | 0.23    |
| P05    | 9.57      | 5.00  | 2.823 | 0.30    |
| P06    | 10.93     | 6.78  | 3.101 | 0.38    |
| P07    | 9.78      | 11.24 | 2.385 | 0.68    |

The SC diet contained 0, 0, 5, 5, 8, 8, 0% Na<sub>2</sub>CO<sub>3</sub> of forage dry matter in Periods 01 to 07 (P01 to P07), respectively.
